# Supplementary material
Source: publisher site journal article supplement (https://www.degruyterbrill.com/publication/journal_key/HTMP/downloadAsset/HTMP_CFP%20Nuclear%20Energy%20Applications%20Materials.pdf)
Supplement: Supplementary file 1 [file HTMP_CFP%20Nuclear%20Energy%20Applications%20Materials.pdf]

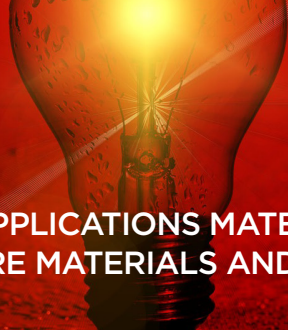

# NUCLEAR ENERGY APPLICATIONS MATERIALS IN HIGH TEMPERATURE MATERIALS AND PROCESSES

## GUEST EDITORS

---

Prof. Yoshinao Kobayashi, Tokyo Institute of Technology, Japan, [kobayashi.y.at@m.titech.ac.jp](mailto:kobayashi.y.at@m.titech.ac.jp)

Dr. Hidemasa Yamano, Japan Atomic Energy Agency, Japan, [yamano.hidemasa@jaea.go.jp](mailto:yamano.hidemasa@jaea.go.jp)

## DESCRIPTION

---

We are thrilled to devote a new Topical Issue of High Temperature Materials and Processes to one of the key topics in modern materials science against the background of tidal current toward a zero-carbon society with a safer energy system. We welcome your original and unpublished articles on any aspect of nuclear energy applications materials as well as materials research related to safe decommissioning and back-end technology.

## KEYWORDS

---

- ▶ Structural components
- ▶ Metallic alloys
- ▶ Refractory materials
- ▶ Fuel systems
- ▶ Cladding materials including coating
- ▶ Fuel materials, absorbers, and fuel cladding interaction
- ▶ Cement and polymers

## HOW TO SUBMIT

---

Before submission authors should carefully read the [Instruction for Authors](#).

In order to make the preparation of manuscript easier, you are advised to use the [Manuscript Template](#).

All submissions to the Topical Issue must be made electronically via the Editorial Manager submission and tracking review system: <https://www.editorialmanager.com/htmp>.

All manuscripts will undergo the standard peer-review process (single-blind, at least two independent reviewers). When entering your submission via the online submission system please choose “Topical Issue: Nuclear Energy”. Submission of a manuscript implies that the work described has not been published before and is not under consideration for publication anywhere else.

All accepted **review papers** in that Topical Issue will be published with a **50% discount**. Please post the NUCLEAR\_REVIEW keyword in the cover letter. For the authors of the **research papers**, we have prepared a **10% discount** to the APC (the keyword is NUCLEAR\_RESEARCH).

The deadline for submissions is **July 1<sup>st</sup>, 2022**, but individual papers will be reviewed and published online on an ongoing basis.

Your benefits due to contribution to the Topical Issue:

- ▶ indexation in Web of Science, SCOPUS, and many other services
- ▶ convenient, web-based paper submission and tracking system – Editorial Manager
- ▶ quick online publication upon completing the publishing process (continuous publication model)
- ▶ better visibility due to Open Access
- ▶ long-term preservation of the content (articles archived in Portico)
- ▶ extensive post-publication promotion for selected papers

In case of any further questions please contact the Managing Editor:  
[ewa.chmielewska@degruyter.com](mailto:ewa.chmielewska@degruyter.com).
